# Supplementary material for: Long-Lasting Sex-Specific Effects Based On Emotion- and Cognition-Related Behavioral Assessment of Adult Rats After Post-Traumatic Stress Disorder From Different Lengths of Maternal Separation
Source: Front Psychiatry. 2019 Jun 4;10:289. doi: 10.3389/fpsyt.2019.00289 (PMC6558979; doi:10.3389/fpsyt.2019.00289)
Supplement: Supplementary Table 1 — Experimental data. [file Table_1.xlsx]

## Sheet: OFT
Upright numbers
M-Control	2	6	7	23	27	27
M-PTSD	7	8	7	5	5	1
M-MS3h-PTSD	10	9	16	12	6	9
M-MS6h-PTSD	8	2	7	1	2	4
F-Control	10	14	18	18	19	20
F-PTSD	13	14	11	18	16	18
F-MS3h-PTSD	21	2	11	16	18	5
F-MS6h-PTSD	16	17	24	30	24	21
Upright numbers(total)
Control	2	6	7	23	27	27	10	14	18	18	19	20
MS6h-PTSD	8	2	7	1	2	4	16	17	24	30	24	21
PTSD	7	8	7	5	5	1	13	14	11	18	16	18
MS3h-PTSD	10	9	16	12	6	9	21	2	11	16	18	5
Time spent in central squares (%)
M-Control	14.08	19.23	20.17	24.14	32.24	37.97
M-PTSD	26.92	22.91	18.96	13.62	20.99	10.44
M-MS3h-PTSD	30.3	9.34	22.47	11.34	13.04	12.19
M-MS6h-PTSD	15.93	15.96	19.36	12.53	15.95	15.95
F-Control	22.63	29.21	30.32	31.53	32.38	40.09
F-PTSD	20.92	27.54	27.56	23.48	20.85	30.59
F-MS3h-PTSD	16.67	22.45	21.23	27.55	33	13.78
F-MS6h-PTSD	21.39	16.81	26.41	29.77	13.47	15.3
Time spent in central squares (%)(total)
Control	14.08	19.23	20.17	24.14	32.24	37.97	22.63	29.21	30.32	31.53	32.38	40.09
PTSD	26.92	22.91	18.96	13.62	20.99	10.44	20.92	27.54	27.56	23.48	20.85	30.59
MS3h-PTSD	30.3	9.34	22.47	11.34	13.04	12.19	16.67	22.45	21.23	27.55	33	13.78
MS6h-PTSD	15.93	15.96	19.36	12.53	15.95	15.95	21.39	16.81	26.41	29.77	13.47	15.3

## Sheet: EPMT
Number of entries into open arms
M-Control	1	2	5	9	12	33
M-PTSD	0	1	0	0	0	1
M-MS3h-PTSD	4	2	0	0	0	0
M-MS6h-PTSD	2	0	2	0	1	1
F-Control	1	2	4	6	10	28
F-PTSD	0	0	6	2	1	2
F-MS3h-PTSD	3	0	4	4	3	2
F-MS6h-PTSD	5	3	4	0	1	0
Number of entries into open arms(total)
Control	1	2	5	9	12	33	1	2	4	6	10	28
PTSD	0	1	0	0	0	1	0	0	6	2	1	2
MS3h-PTSD	4	2	0	0	0	0	3	0	4	4	3	2
MS6h-PTSD	2	0	2	0	1	1	5	3	4	0	1	0
Time spent in open arms (s)
M-Control	1.77	2.04	3.71	4.98	10.77	23.02
M-PTSD	0	0.9	0.44	0	0	4.06
M-MS3h-PTSD	3.91	2.69	0	0	8.25	8.62
M-MS6h-PTSD	2.73	0	2.06	0	8.87	2.73
F-Control	0.33	4.15	10.06	14.23	35.73	35.83
F-PTSD	0	7.06	9.07	9.31	13.56	15.44
F-MS3h-PTSD	13.06	0	42.44	31.44	23.38	22
F-MS6h-PTSD	38.19	17.38	32.69	0	0.44	9
Time spent in open arms (s)(total)
Control	1.77	2.04	3.71	4.98	10.77	23.02	0.33	4.15	10.06	14.23	35.73	35.83
PTSD	0	0.9	0.44	0	0	4.06	0	7.06	9.07	9.31	13.56	15.44
MS3h-PTSD	3.91	2.69	0	0	8.25	8.62	13.06	0	42.44	31.44	23.38	22
MS6h-PTSD	2.73	0	2.06	0	8.87	2.73	38.19	17.38	32.69	0	0.44	9

## Sheet: WMT
Mean latency to find the platform (s)
Contral
M1	1.69	1.75	1.75	3	3.44	4.25	4.38	5.62	6.5	9.5	14.12	16.12	17.31	18.75	19.12	20.5	22.19	23.38	24.44	26.69	34.62	40.94	50.56	90
M2	2	2.25	2.5	2.56	3.75	4.5	7.31	7.38	9.31	9.75	11.44	11.5	12.81	16.25	16.94	18.5	19.5	21.12	21.75	24.81	28.75	30.06	49.25	90
M3	1.25	1.37	2.75	3.75	3.94	5.69	6.69	7.5	7.81	7.87	8.31	9.88	10.25	12.69	14.5	15	20.38	21.31	25.81	26.44	31.31	31.31	34.06	90
M4	0.38	0.5	1.44	1.81	1.94	2.38	2.87	2.94	3.31	3.44	3.69	4.38	5.56	5.69	7.87	9.25	9.75	13.44	14.81	18.56	21.69	28.88	35.12	39.44
F1	2.44	4.88	6.12	7.19	7.25	9.88	11.19	11.69	13.19	13.62	13.69	19	19.69	21.44	28.94	29.19	32	39.25	46	72.88	73.75	78.5	90	90
F2	0.81	2.75	3.81	5.31	6.31	8.12	8.87	9.38	10.88	12.5	13.81	14.5	15.37	17.19	19.06	21.31	21.88	31.75	35.62	36.5	36.56	36.88	90	90
F3	0.06	1.37	3	3.75	4.12	4.31	4.38	5.12	6.62	6.94	6.94	8.87	9.31	10.94	13.25	13.81	15.31	18.19	20.81	23.81	39.37	68.38	81.31	90
F4	2.94	3.94	4.5	4.75	4.88	5.38	6.94	7.56	8.87	11.19	11.37	12.06	12.5	15.19	17.31	17.56	17.88	18.19	18.44	24.44	25.12	33.19	51.81	90
PTSD
M1	0.5	3.06	4.56	5.38	5.75	7.56	7.75	8.94	9.88	11.06	13.75	19.06	19.12	25.62	28.25	28.37	29.5	38	59.56	72.81	90	90	90	90
M2	2.81	2.81	4.81	5.56	6.56	7.06	8.06	13.31	16.38	18.12	19.25	19.56	24.62	26.56	27.06	27.69	33	54.81	57.06	60.5	60.94	63.75	64.5	77.87
M3	1.81	2.44	3.31	3.69	3.75	4.12	4.56	5.19	5.44	5.75	5.94	6.25	6.56	6.81	10.44	12.19	12.44	25.25	28.31	28.75	33.5	42.94	43.75	49.56
M4	2.81	3.19	3.94	4.5	4.62	4.69	4.75	5.12	5.44	5.88	6.06	7.12	8.69	9.31	9.69	10.12	10.25	10.56	11.69	13.12	13.81	14.5	16	16.69
F1	2.62	3.5	5.94	6.62	9.19	11.87	14.5	15.37	20.56	20.62	24.44	32.25	36.31	52.31	57.62	60.37	79	90	90	90	90	90	90	90
F2	1.69	2.19	2.5	2.94	3.75	6.25	7.94	8.38	8.94	11.44	14.56	15	15.31	15.75	15.88	18.56	19.12	23.12	38	43.12	90	90	90	90
F3	1.31	1.87	2.06	2.19	2.56	3	3.12	3.19	3.25	3.5	3.5	5	5.31	6.5	6.75	6.94	7.94	8.12	12.19	15.5	15.69	29.38	32.56	33.75
F4	1.12	2.62	2.62	3	3.25	3.75	3.88	5.69	5.94	6.06	6.19	6.75	7.69	8.87	9	15.94	16.25	16.94	18.19	20.5	21.37	25.87	31	36.75
3h-PTSD
M1	0.12	2.75	3.19	3.19	3.69	5.5	7.25	8.81	10.62	15.37	16.69	17.62	25.81	26.94	32.31	34.44	34.94	52.31	77.56	88.44	90	90	90	90
M2	2.38	2.69	3	4.12	5	5.38	6.31	6.81	8.06	8.81	9.62	11	11.56	13.12	17.25	17.69	18.81	18.87	25.62	31.62	32.56	33.31	33.94	59.19
M3	0.88	2	2.38	2.5	2.62	2.69	3.06	3.06	3.88	3.94	4.31	4.5	4.69	4.88	6.38	6.44	6.5	6.56	6.81	7.44	8.87	17.81	29.56	39
M4	2.19	2.25	2.56	2.81	3.25	3.5	3.94	4.19	4.44	4.44	5.44	5.75	6.19	6.44	6.69	7	7.25	7.87	9.94	12.75	13.88	19.44	21.06	22.44
F1	2.75	9.56	11.44	11.44	13.94	15	18.06	18.75	21.5	27.19	29.87	33.75	34.06	40.12	47.12	53.44	59.94	90	90	90	90	90	90	90
F2	0	2	2.19	3	4.38	4.62	5.31	7.5	7.62	7.81	9.12	12.12	14.62	22.44	23.19	26.81	27.88	28.69	32.31	35.88	40.87	77.25	90	90
F3	2.81	3.06	3.81	3.88	5.56	5.62	5.69	5.81	6.31	6.5	7.38	8.25	8.5	10.25	12.69	14	14.31	14.94	17.25	19.69	22.5	23.81	29.75	64.94
F4	0.56	1.75	2.56	2.87	2.94	4.81	4.88	6.38	6.44	6.56	7	7.38	7.69	7.75	8.31	8.31	8.44	9.75	12.94	13.37	14.62	15.25	15.37	59.75
6h-PTSD
M1	8.97	9.56	10.25	16.34	19.67	25.68	26.67	29.5	32.55	33	33.64	33.67	35.09	39.35	48.54	58.39	59.85	60.12	90	90	22.94	29.33	45.42	48.32
M2	1.25	3.06	3.94	9.81	17.19	17.81	22	22.94	26.87	28.56	29.19	36.12	36.38	41.44	47.31	57.31	59.12	64.88	90	90	16.54	28.24	38.13	58.44
M3	1.25	3.12	3.69	4.81	4.81	5.31	6.12	8.31	9.44	9.75	10.81	14.25	15.06	15.44	17.25	20.56	25.44	40.25	41.56	90	5.34	14.87	19.66	40.64
M4	2.06	2.44	2.94	3.69	3.81	4.25	5.06	6.56	7.38	8.5	10.94	11.19	11.81	12.94	13.44	19.88	21.81	25.06	38.62	90	4.19	8.26	17.09	27.98
F1	0.19	0.31	1.62	4.69	6.94	8.19	9.88	11.62	13.56	16.69	17.38	25.31	31.12	31.75	38.31	42.38	42.94	44.44	56.25	73.44	90	90	90	90
F2	2.12	3.25	3.94	5.38	5.56	6.56	7.06	7.75	8.31	8.31	8.56	9.88	11.25	13.94	15.75	21.37	21.5	26.56	30.12	30.31	33.19	37.5	50.94	90
F3	1.37	2.19	2.31	2.69	3.69	4.06	5.94	6.69	7.56	8.25	13.69	15.25	15.5	16.94	17.19	17.56	19.5	25.19	28	30.12	35.38	36.25	37.25	60.12
F4	2.19	2.25	2.87	3.38	3.94	4.19	8.75	9.19	9.75	10.19	10.44	10.94	12.31	12.56	15.19	17.06	18.06	18.94	20.12	21.94	28.12	32	39.88	45.69
Quadrant time (%)
M-Control	11.81	12.36	14.31	16.39	21.04	21.18	27.01	27.08	33.89	36.11	36.39	38.47
M-PTSD	16.67	18.82	14.93	10.07	22.71	17.01	13.89	12.85	25.83	12.22	13.68	20.97
M-MS3h-PTSD	17.5	17.22	14.58	24.03	18.82	22.22	24.58	14.86	12.01	16.53	15.83	18.82
M-MS6h-PTSD	15.67	22.78	19.03	19.93	12.29	14.81	10.77	19.1	12.57	12.36	8.61	10.53
F-Control	8.89	12.01	15	17.29	18.26	18.75	18.82	19.86	21.25	21.53	22.01	25.69
F-PTSD	15.14	15.9	14.1	12.92	16.53	19.17	12.43	28.54	13.82	19.93	16.39	15.49
F-MS3h-PTSD	10.35	6.74	5.35	14.51	7.15	10.07	20.9	17.08	16.46	19.72	7.43	23.33
F-MS6h-PTSD	9.86	25	18.68	13.4	8.12	9.17	19.03	11.04	12.99	15.9	14.72	9.38
Quadrant time (%)(total)
Control	11.81	12.36	14.31	16.39	21.04	21.18	27.01	27.08	33.89	36.11	36.39	38.47	8.89	12.01	15	17.29	18.26	18.75	18.82	19.86	21.25	21.53	22.01	25.69
PTSD	16.67	18.82	14.93	10.07	22.71	17.01	13.89	12.85	25.83	12.22	13.68	20.97	15.14	15.9	14.1	12.92	16.53	19.17	12.43	28.54	13.82	19.93	16.39	15.49
MS3h-PTSD	17.5	17.22	14.58	24.03	18.82	22.22	24.58	14.86	12.01	16.53	15.83	18.82	10.35	6.74	5.35	14.51	7.15	10.07	20.9	17.08	16.46	19.72	7.43	23.33
MS6h-PTSD	15.67	22.78	19.03	19.93	12.29	14.81	10.77	19.1	12.57	12.36	8.61	10.53	9.86	25	18.68	13.4	8.12	9.17	19.03	11.04	12.99	15.9	14.72	9.38

## Sheet: FST
Total immobility (s)
M-Control	21.77	1.25	1.45	7.45	12.77	0
M-PTSD	36.52	5.77	22.89	0.46	1.87	0.19
M-MS3h-PTSD	14.82	11.94	2.71	4.39	1.42	1.74
M-MS6h-PTSD	2.71	3.12	2.8	2.19	2.77	2.67
F-Control	0.34	0	0.56	0	0.34	0.59
F-PTSD	0.05	0.11	0.12	0.36	0	0
F-MS3h-PTSD	7.35	1.44	8.22	3.25	13.42	4.25
F-MS6h-PTSD	2.75	0.05	6.86	2.46	1.63	2.75
Total immobility (s)(total)
Control	21.77	1.25	1.45	7.45	12.77	0	0.34	0	0.56	0	0.34	0.59
PTSD	36.52	5.77	22.89	0.46	1.87	0.19	0.05	0.11	0.12	0.36	0	0
MS3h-PTSD	14.82	11.94	2.71	4.39	1.42	1.74	7.35	1.44	8.22	3.25	13.42	4.25
MS6h-PTSD	2.71	3.12	2.8	2.19	2.77	2.67	2.75	0.05	6.86	2.46	1.63	2.75
